# Supplementary material
Source: publisher site journal article supplement (https://www.dovepress.com/article/331468)
Supplement: Supplementary file 1 [file get_supplementary_file.php]

**Supplementary Figure 1**. The survival rate of 6 VV isolates during anti-complement killing test.


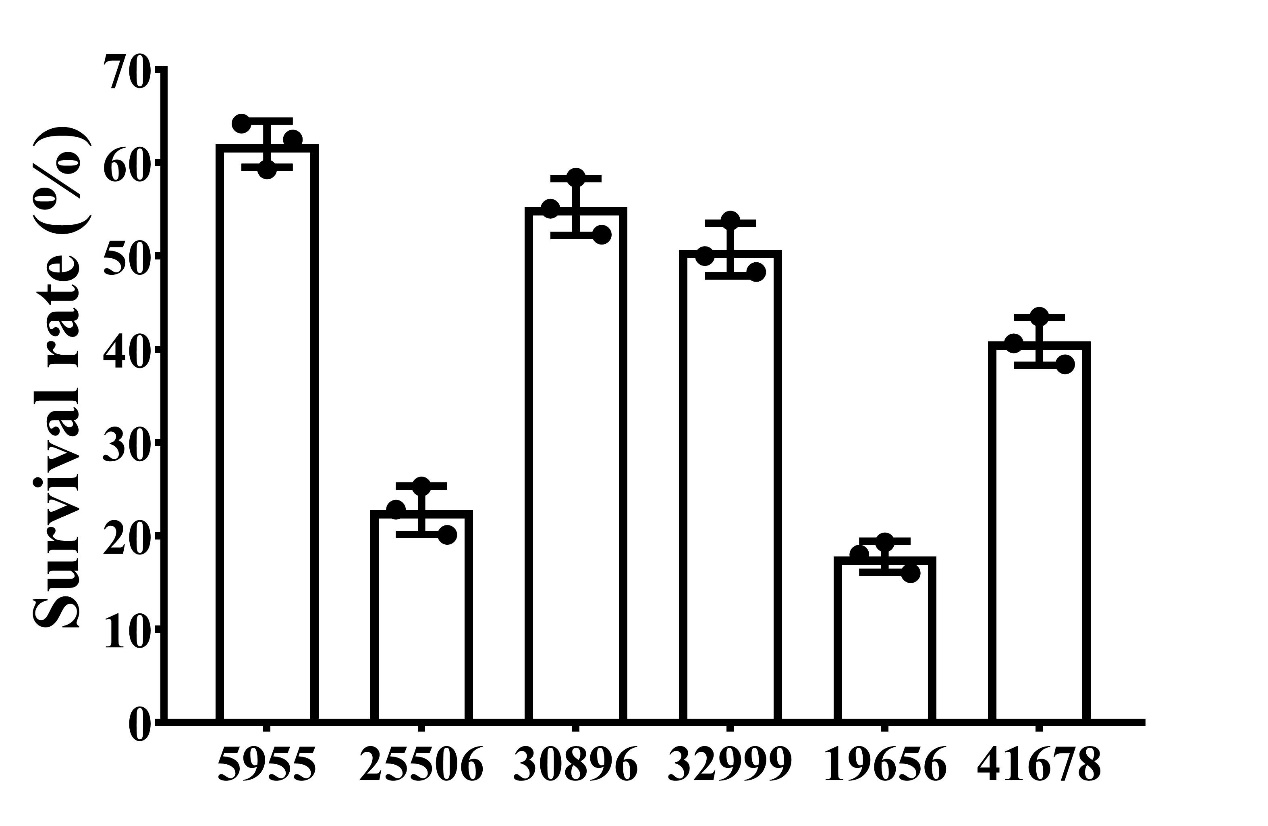


**Supplementary Table 1.** List of 157 publicly available clinical VV isolates used for comparative genomic analysis.

| **BioSample** | **Source** | **Location** | **MLST** | **Date** |
| --- | --- | --- | --- | --- |
| SAMN07739071 | Environmental | Denmark | 139 | 1995 |
| SAMN07739093 | Environmental | Spain | 526 | 2003 |
| SAMN07739090 | Environmental | Spain | 112 | 2003 |
| SAMN07739083 | Environmental | China (Taiwan) | 500 | 1993 |
| SAMN07739080 | Environmental | China (Taiwan) | New | NA |
| SAMN07739074 | Environmental | Spain | 139 | 2002 |
| SAMN07739073 | Environmental | Denmark | 9 | 1996 |
| SAMN07739069 | Clinical | Denmark | 122 | 1994 |
| SAMN07739072 | Environmental | Denmark | 139 | 1995 |
| SAMN07739070 | Environmental | Denmark | 139 | 1995 |
| SAMN07739076 | Clinical | Denmark | New | 1994 |
| SAMN07739097 | Environmental | USA | 501 | NA |
| SAMN03470190 | Environmental | Germany | 132 | 1995 |
| SAMN03486854 | Environmental | Germany | 128 | 2010 |
| SAMN03483416 | Environmental | Germany | 113 | 2010 |
| SAMN03486856 | Clinical | Germany | 117 | 2010 |
| SAMN03483332 | Environmental | Germany | 105 | 1999 |
| SAMN07739081 | Environmental | Denmark | 140 | 2004 |
| SAMN07739079 | Environmental | Spain | 489 | 1990 |
| SAMN11552938 | Environmental | USA | 222 | 2015 |
| SAMN07739077 | Clinical | USA | 1 | 1977 |
| SAMN07739078 | Environmental | Spain | 112 | 1990 |
| SAMN07739096 | Environmental | USA | 484 | NA |
| SAMN07739066 | Clinical | Israel | 8 | 1996 |
| SAMN07739065 | Clinical | Israel | 8 | 1996 |
| SAMN07739089 | Clinical | USA | 511 | NA |
| SAMN07739085 | Clinical | USA | 478 | 1994 |
| SAMN07739084 | Environmental | USA | 462 | 2005 |
| SAMN07739075 | Environmental | USA | 470 | 2005 |
| SAMN07739095 | Environmental | USA | 509 | 2005 |
| SAMN07739094 | Environmental | USA | 483 | 2004 |
| SAMN11538979 | Environmental | USA | 58 | 2015 |
| SAMN11552945 | Environmental | USA | New | 2015 |
| SAMN07739098 | Environmental | USA | 517 | 2005 |
| SAMN03483372 | Clinical | Germany | 135 | 2010 |
| SAMN07739067 | Clinical | Spain | 135 | 2001 |
| SAMN07739086 | Clinical | USA | 16 | 1995 |
| SAMN07739068 | Environmental | USA | 487 | NA |
| SAMN03486858 | Clinical | Germany | 118 | 2010 |
| SAMN03486932 | Clinical | Germany | 118 | 2011 |
| SAMN07739082 | Environmental | Japan | New | 1979 |
| SAMN09270178 | Environmental | China (Taiwan) | 432 | 1997 |
| SAMN09270229 | Environmental | China (Taiwan) | 76 | 2008 |
| SAMN13500489 | Clinical | NA | New | NA |
| SAMN13500488 | Clinical | NA | New | NA |
| SAMN13500487 | Clinical | NA | New | NA |
| SAMN02469425 | Clinical | USA | New | 1994 |
| SAMN03371459 | Environmental | South Korea | 503 | 1905 |
| SAMN03371454 | Environmental | China (Taiwan) | 507 | 2011 |
| SAMN03371452 | Environmental | China (Taiwan) | 508 | 2011 |
| SAMN04125838 | Environmental | NA | New | NA |
| SAMN03996332 | Clinical | NA | 466 | NA |
| SAMN03092747 | Environmental | Japan | 112 | 1979 |
| SAMN03349353 | Environmental | South Korea | 491 | 2011 |
| SAMN03371453 | Environmental | China (Taiwan) | 480 | 2011 |
| SAMN03371455 | Environmental | South Korea | 481 | 2011 |
| SAMN03371457 | Environmental | South Korea | 474 | 2011 |
| SAMN03371458 | Environmental | South Korea | 471 | 2011 |
| SAMN03371456 | Environmental | South Korea | 504 | 2011 |
| SAMN04193762 | Environmental | USA | 509 | 1999 |
| SAMN04194063 | Environmental | USA | 514 | 1999 |
| SAMN04194080 | Clinical | USA | 478 | 1994 |
| SAMN04219563 | Environmental | NA | 487 | NA |
| SAMN04219564 | Environmental | USA | 509 | 2004 |
| SAMN03273306 | Environmental | Spain | 140 | 2004 |
| SAMN03486945 | Environmental | Spain | New | 1999 |
| SAMN08939840 | Environmental | China (Mainland) | New | 2016 |
| SAMN08939838 | Environmental | China (Mainland) | New | 2016 |
| SAMN08939839 | Environmental | China (Mainland) | New | 2016 |
| SAMN09386753 | Environmental | USA | 518 | 2016 |
| SAMN09386818 | Environmental | USA | 488 | 2007 |
| SAMN09386620 | Environmental | USA | 475 | 2007 |
| SAMN09386618 | Environmental | USA | 518 | 2007 |
| SAMN03996331 | Clinical | USA | 467 | NA |
| SAMN03996333 | Clinical | USA | 16 | NA |
| SAMEA3121334 | Environmental | NA | 466 | NA |
| SAMEA3121336 | Environmental | NA | 3 | NA |
| SAMN03293314 | Environmental | Denmark | 112 | 1994 |
| SAMEA5852038 | Environmental | Bangladesh | 487 | NA |
| SAMN00216032 | Environmental | NA | 482 | NA |
| SAMN02990647 | Environmental | Israel | 59 | 1997 |
| SAMN02990648 | Environmental | Israel | New | 1997 |
| SAMN04193761 | Clinical | USA | 16 | 1995 |
| SAMN04193760 | Clinical | USA | 16 | 1995 |
| SAMN04194078 | Clinical | USA | 21 | 1996 |
| SAMN08213428 | Environmental | USA | 496 | 2012 |
| SAMN09386735 | Environmental | USA | 222 | 2007 |
| SAMN09386734 | Environmental | USA | 505 | 2006 |
| SAMN09386754 | Environmental | USA | 493 | 2007 |
| SAMN09386622 | Environmental | USA | 515 | 2007 |
| SAMN09386759 | Environmental | USA | 502 | 2007 |
| SAMN09386736 | Environmental | USA | 498 | 2006 |
| SAMN09386756 | Environmental | USA | 473 | 2007 |
| SAMN09386767 | Environmental | USA | 495 | 2007 |
| SAMN09386757 | Environmental | USA | 472 | 2006 |
| SAMN09386764 | Environmental | USA | 520 | 2007 |
| SAMN09386763 | Environmental | USA | 520 | 2007 |
| SAMN09386765 | Environmental | USA | 490 | 2006 |
| SAMN09386766 | Environmental | USA | 522 | 2006 |
| SAMN09386815 | Environmental | USA | 506 | 2007 |
| SAMN09386768 | Environmental | USA | 497 | 2007 |
| SAMN09386621 | Environmental | USA | 477 | 2006 |
| SAMN09386614 | Environmental | USA | 476 | 2006 |
| SAMN09386611 | Environmental | USA | 498 | 2006 |
| SAMN09386612 | Environmental | USA | 479 | 2007 |
| SAMN09386619 | Environmental | USA | 469 | 2007 |
| SAMN09386737 | Environmental | USA | 479 | 2007 |
| SAMN09386750 | Environmental | USA | 23 | 2007 |
| SAMN09386776 | Environmental | USA | 499 | 2007 |
| SAMN09386816 | Environmental | USA | 512 | 2007 |
| SAMN09386781 | Environmental | USA | 22 | 2007 |
| SAMN09386770 | Environmental | USA | 486 | 2007 |
| SAMN09386771 | Environmental | USA | 523 | 2007 |
| SAMN09386616 | Environmental | USA | New | 2007 |
| SAMN09386615 | Environmental | USA | 519 | 2007 |
| SAMN11489491 | Environmental | India | New | NA |
| SAMN03273308 | Environmental | Spain | 112 | 2002 |
| SAMEA104200660 | Clinical | USA | 467 | 1964 |
| SAMN02471155 | Clinical | China (Mainland) | 3 | 2010 |
| SAMD00046713 | Environmental | NA | 3 | NA |
| SAMN03395192 | Clinical | Israel | 8 | 1996 |
| SAMN06062368 | Environmental | USA | 136 | 2016 |
| SAMN06062369 | Environmental | USA | 136 | 2016 |
| SAMN06062372 | Environmental | USA | 136 | 2016 |
| SAMN06140069 | Environmental | USA | 136 | 2016 |
| SAMN06140070 | Environmental | USA | 136 | 2016 |
| SAMN06090785 | Clinical | USA | 136 | NA |
| SAMN06062373 | Environmental | USA | 136 | 2016 |
| SAMN03292655 | Clinical | France | 112 | 1980 |
| SAMN03293315 | Clinical | Australia | 112 | 1997 |
| SAMN06062367 | Environmental | USA | 492 | 2016 |
| SAMN06062374 | Environmental | USA | 492 | 2016 |
| SAMN06062370 | Environmental | USA | 492 | 2016 |
| SAMN06062366 | Environmental | USA | 492 | 2016 |
| SAMN06062371 | Environmental | USA | 492 | 2016 |
| SAMN14342352 | Environmental | NA | 521 | NA |
| SAMN02471035 | Environmental | Israel | New | NA |
| SAMN03571538 | Environmental | Israel | 468 | 2005 |
| SAMN03073547 | Clinical | Israel | 494 | 2004 |
| SAMN07660997 | Clinical | Brazil | 513 | 2016 |
| SAMN09386749 | Environmental | USA | 516 | 2007 |
| SAMN09386738 | Environmental | USA | 171 | 2007 |
| SAMN09386758 | Environmental | USA | 1 | 2007 |
| SAMN09386624 | Environmental | USA | 1 | 2007 |
| SAMN04194077 | Clinical | USA | 15 | 1997 |
| SAMN09386780 | Environmental | USA | New | 2007 |
| SAMN09386817 | Environmental | USA | New | 2007 |
| SAMN02990646 | Clinical | Israel | 8 | 1997 |
| SAMN09386708 | Environmental | USA | 485 | 2007 |
| SAMN09386617 | Environmental | USA | 479 | 2007 |
| SAMN09386733 | Environmental | USA | 510 | 2007 |
| SAMN08939837 | Environmental | China (Mainland) | 521 | 2016 |
| SAMN09396656 | Environmental | Mexico | 527 | 2011 |
| SAMN09396655 | Environmental | Mexico | 528 | 2011 |
| SAMN02990644 | Clinical | Israel | 8 | 2009 |
| SAMN02990645 | Clinical | Israel | 8 | 2003 |
| SAMN03292494 | Environmental | Spain | 444 | 1990 |

MLST, multi-locus sequence typing; NEW, novel STs; NA, not available.

**Supplementary Table 2.** The virulence genes identified in 6 VV isolates

| **Genes** | **5955**  **(Blood)**  **(n=141)** | **25506**  **(Blood)**  **(n=144)** | **30896**  **(Blood)**  **(n=149)** | **32999**  **(Blood)**  **(n=141)** | **19656**  **(Puncture fluid)**  **(n=146)** | **41678**  **(Puncture fluid)**  **(n=142)** |
| --- | --- | --- | --- | --- | --- | --- |
| *luxS* | + | + | + | + | + | + |
| *cpsA-D,F,H-J* | + | + | + | + | + | + |
| *wza-c* | + | + | + | + | + | + |
| *wbfY* | + | + | + | + | + | + |
| *wecB* | + | - | - | - | + | - |
| *wecC* | - | - | - | - | + | - |
| *wbfV* | + | + | + | + | + | + |
| *wbfT* | - | - | - | - | + | - |
| *wbuB* | - | - | - | - | + | - |
| *wcaJ* | - | + | + | - | - | + |
| *epsA,C-J,I-N* | + | + | + | + | + | + |
| *epsH* | + | + | + | - | + | + |
| *cheZ,Y* | + | + | + | + | + | + |
| *flaA,B,E,I,G* | + | + | + | + | + | + |
| *flaC* | - | - | - | - | - | + |
| *flaD* | - | + | + | + | - | - |
| *flhA,B,F,G* | + | + | + | + | + | + |
| *fliA,E,F,I-S* | + | + | + | + | + | + |
| *fliD* | - | + | + | + | + | + |
| *fliG* | + | + | + | + | + | - |
| *flgA-N* | + | + | + | + | + | + |
| *flrA-C* | + | + | + | + | + | + |
| *motA,B,Y* | + | + | + | + | + | + |
| *motX* | + | + | + | + | + | - |
| *cheA,B,R,W,V* | + | + | + | + | + | + |
| *VV2_0087 ATPase* | + | + | + | + | + | + |
| *tadA,B,D-F,G,Z* | + | + | + | + | + | + |
| *tadB* | + | + | + | + | + | + |
| *tadC* | - | + | + | - | - | - |
| *rcpA,C* | + | + | + | + | + | + |
| *flp* | - | + | + | - | - | - |
| *pilA* | - | - | + | - | - | - |
| *pilB-F,M,N,O-Q,T,U* | + | + | + | + | + | + |
| *fimT* | - | - | + | - | - | - |
| *hutA* | - | - | + | - | + | + |
| *hutR* | + | + | + | + | + | + |
| *tlh* | + | + | + | + | + | + |
| *ilpA* | + | + | + | + | + | + |
| *mshA* | + | - | + | - | - | - |
| *mshB-N* | + | + | + | + | + | + |
| *vvp* | + | + | + | + | + | + |
| *vctC,D,G* | + | + | + | + | + | + |
| *rtxC-D* | + | + | + | + | + | + |
| *vibA-C,E,F,H* | + | + | + | + | + | + |
| *vibD* | - | + | + | + | + | + |
| *viuA* | - | - | + | + | - | + |
| *viuB* | - | - | + | - | + | - |
| *vctP* | + | - | + | + | + | + |
| *vuuA* | + | + | - | - | + | - |
| *vuuB* | + | + | - | + | - | + |
| *VVA1305-1307,1295,1298* | + | + | + | + | + | + |
| *vvhA* | + | + | + | + | + | + |

n, number of virulence genes.
